# Supplementary material for: Recombination Drives Evolution of the Clostridium difficile 16S-23S rRNA Intergenic Spacer Region
Source: PubMed Central journal article supplement (PMC4164361; doi:10.1371/journal.pone.0106545), 2014-09-15

**Figure S1. Sequence logos showing conserved and variable nucleotide sites in the ISR building blocks.**

**Start**

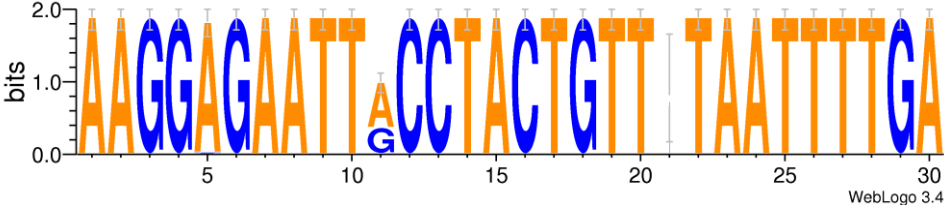

**Ntrna**

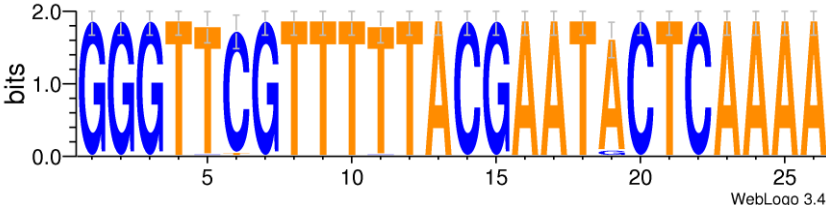

**Trna**

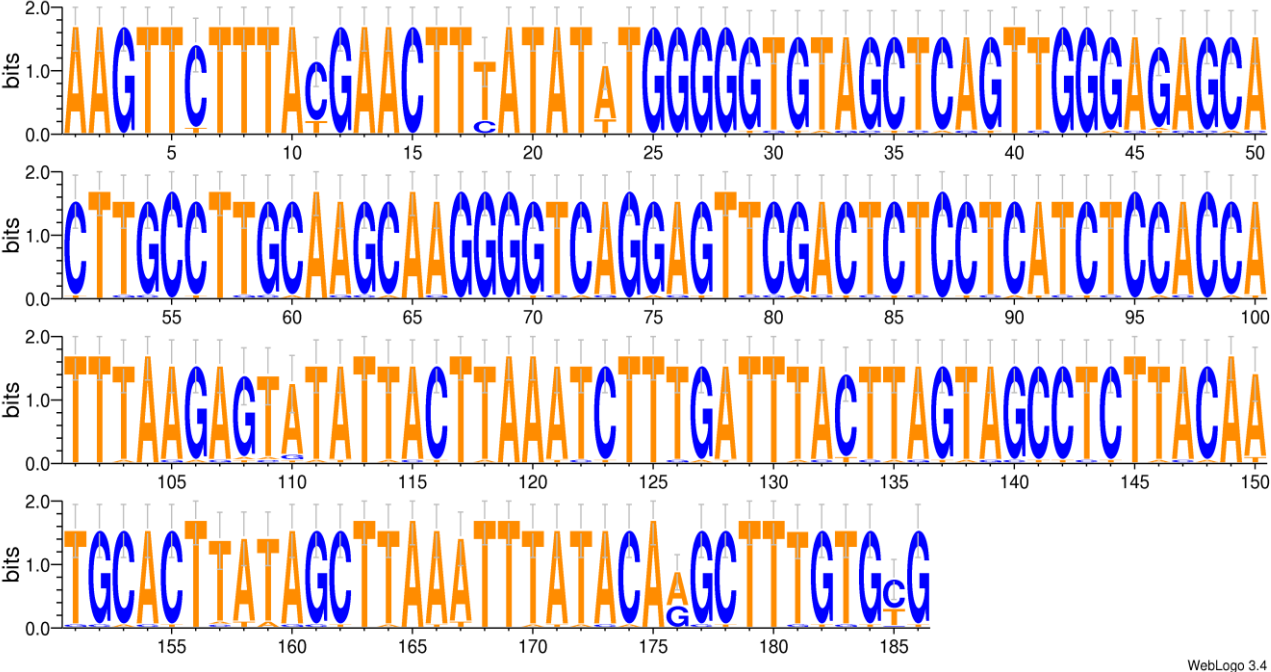

### 9 bp direct repeat (DR)

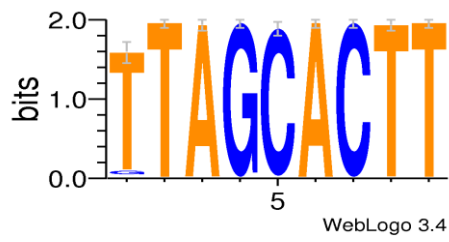

### 33 bp spacer

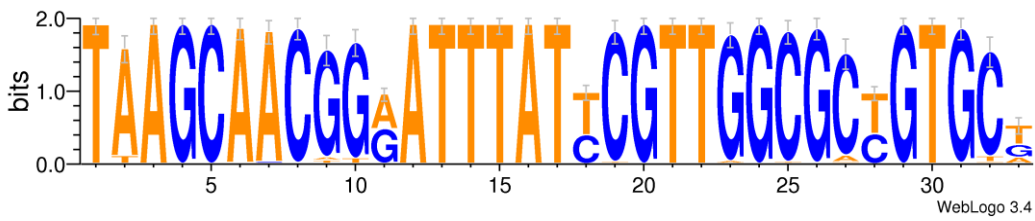

### 53 bp spacer

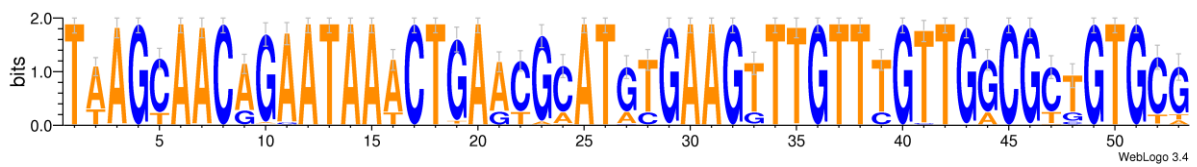

### End

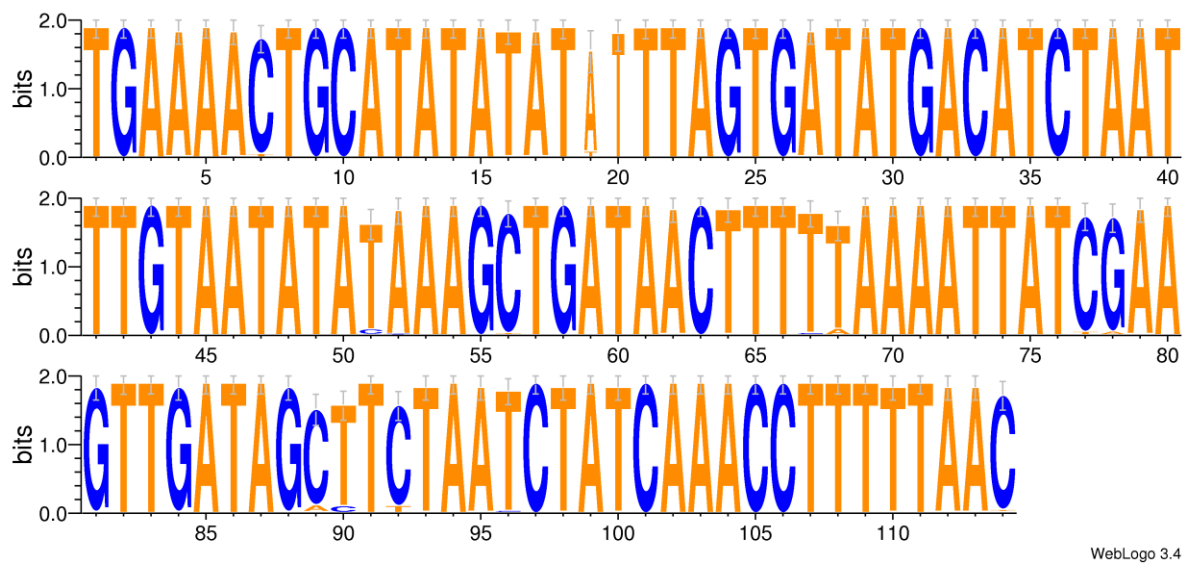

Supplement: pone.0106545.s001.pdf [file pone.0106545.s001.pdf]
