# Supplementary material for: Recombination Drives Evolution of the Clostridium difficile 16S-23S rRNA Intergenic Spacer Region
Source: PubMed Central journal article supplement (PMC4164361; doi:10.1371/journal.pone.0106545), 2014-09-15

Figure S3. Proposed secondary structure model of the RNA transcript of *C. difficile* rRNA operon.

(A) ISR without the tRNA<sup>Ala</sup> gene and (B) ISR with tRNA<sup>Ala</sup> gene. The 16S and 23S rRNA are represented by triangles. Direct repeats are marked with boxes.

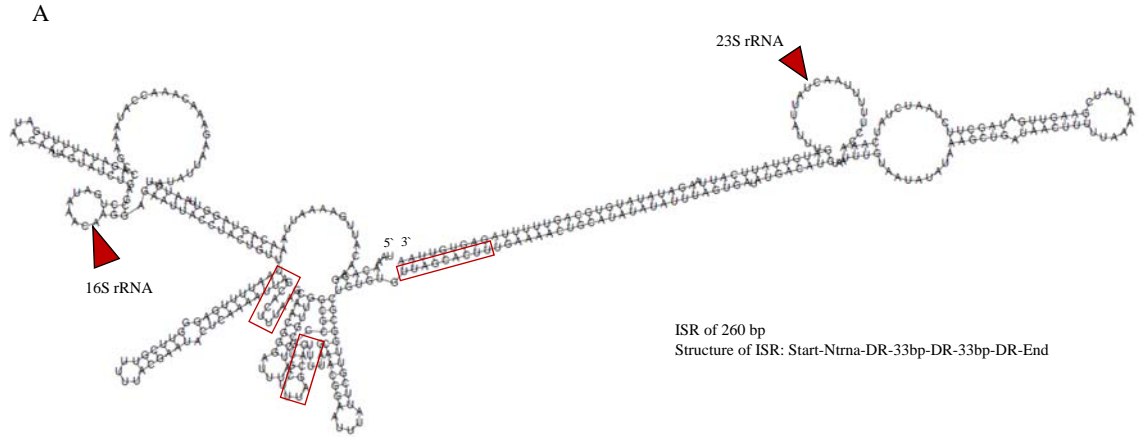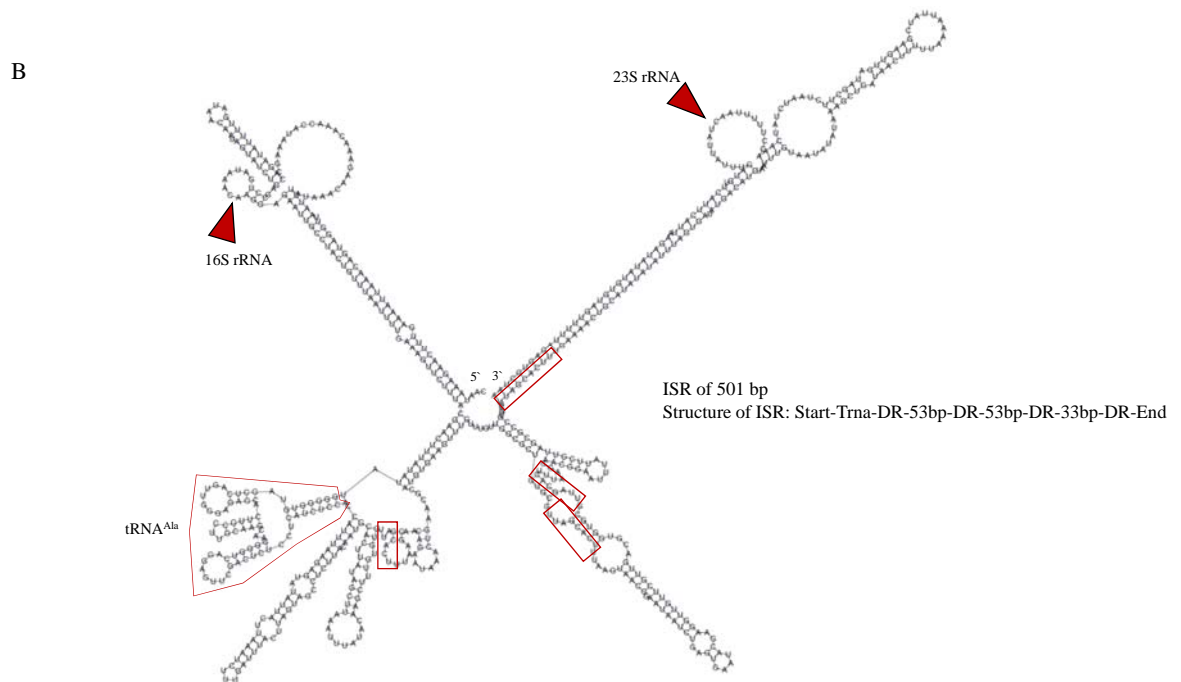

Supplement: pone.0106545.s003.pdf [file pone.0106545.s003.pdf]
