# Supplementary material for: Recombination Drives Evolution of the Clostridium difficile 16S-23S rRNA Intergenic Spacer Region
Source: PLoS One. 2014 Sep 15;9(9):e106545. doi: 10.1371/journal.pone.0106545 (PMC4164361; doi:10.1371/journal.pone.0106545)
Supplement: Table S1 — Banding patterns of PCR-ribotypes included in the analysis. Number and sizes of amplified ISRs (including primers) obtained for each PCR-ribotype using the sequencer based PCR-ribotyping. (PDF) [file pone.0106545.s004.pdf]

**Table S1. Banding patterns of PCR-ribotypes included in the analysis obtained by sequencer based PCR-ribotyping. Fragment lengths are in base pairs.**

[illegible][illegible]
